# Supplementary material for: Vpu Exploits the Cross-Talk between BST2 and the ILT7 Receptor to Suppress Anti-HIV-1 Responses by Plasmacytoid Dendritic Cells
Source: PubMed Central journal article supplement (PMC4501562; doi:10.1371/journal.ppat.1005024), 2015-07-14

**Fig. S3**

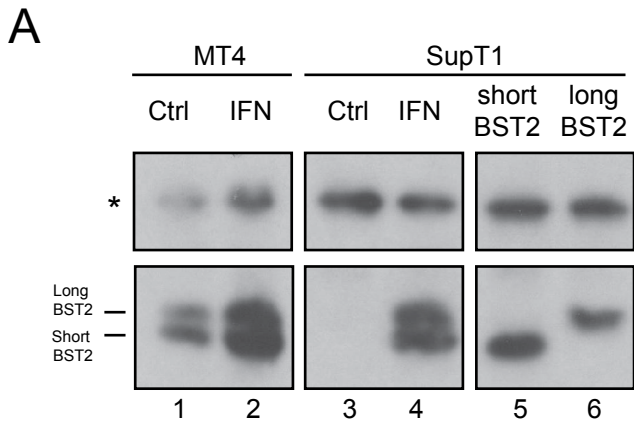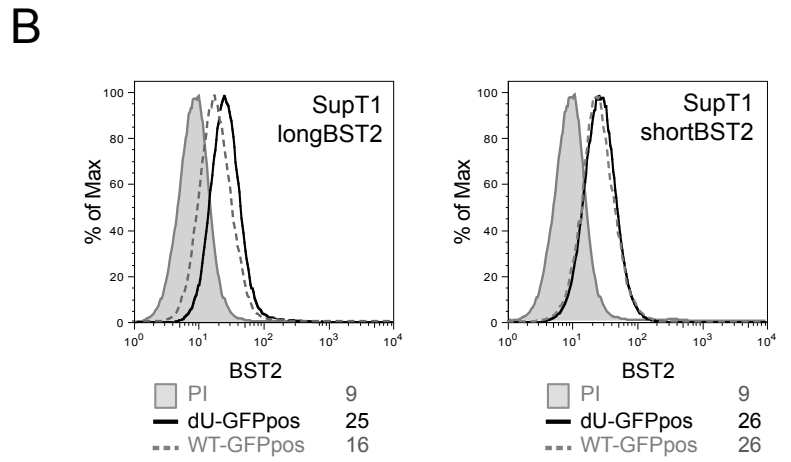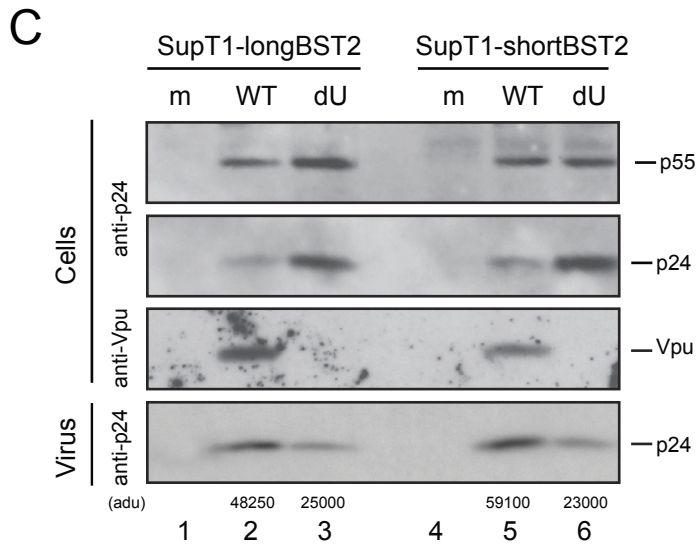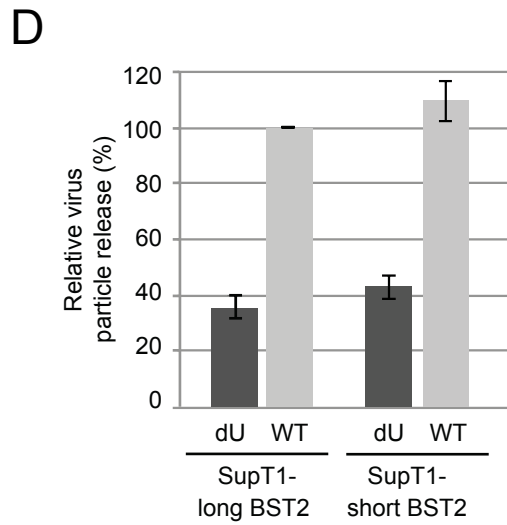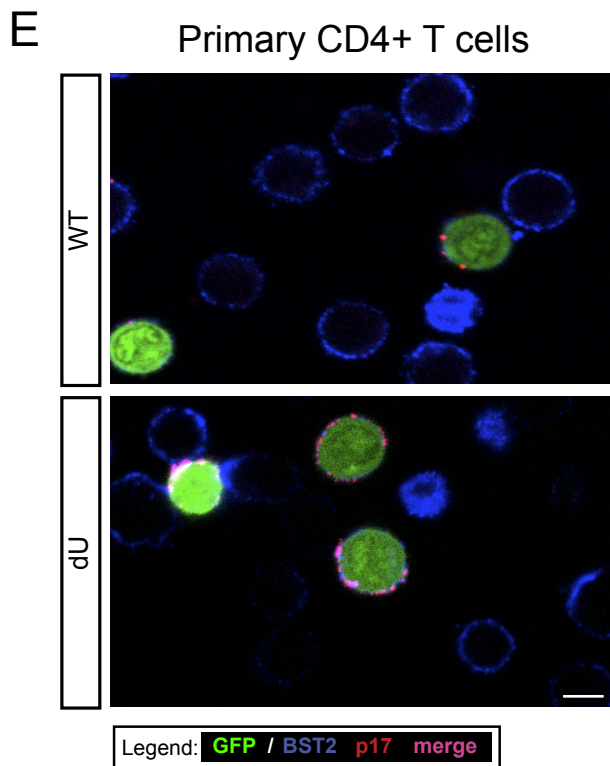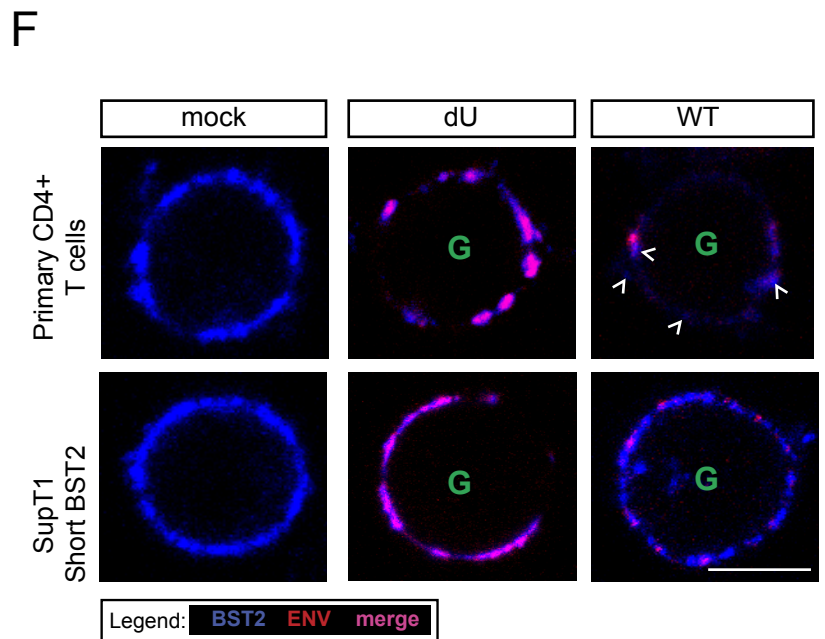

Supplement: ppat.1005024.s003.pdf [file ppat.1005024.s003.pdf]
