# Supplementary material for: Vpu Exploits the Cross-Talk between BST2 and the ILT7 Receptor to Suppress Anti-HIV-1 Responses by Plasmacytoid Dendritic Cells
Source: PubMed Central journal article supplement (PMC4501562; doi:10.1371/journal.ppat.1005024), 2015-07-14
Supplement: ppat.1005024.s005.pdf [file ppat.1005024.s005.pdf]

**Fig. S5**

**A**

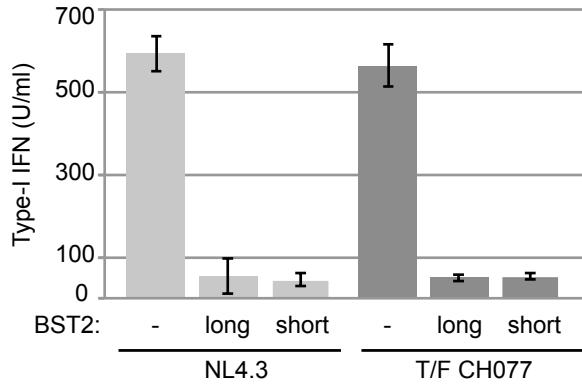

**B**

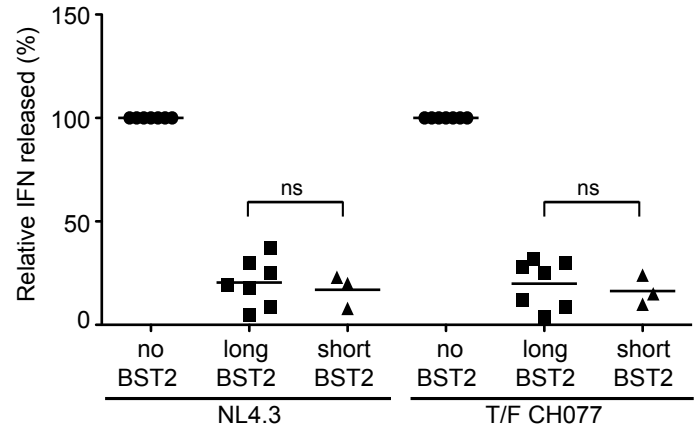

Repeated measures ANOVA with Bonferroni's multiple comparison test was used. Error bars represent SD.
